# Supplementary material for: A Genomic Profile of Local Immunity in the Melanoma Microenvironment Following Treatment with α Particle-Emitting Ultrasmall Silica Nanoparticles
Source: PubMed Central journal article supplement (PMC7462037; doi:10.1089/cbr.2019.3150), 2020-08-13
Supplement: Supp_Fig1.pdf [file Supp_Fig1.pdf]

## Supplementary Data

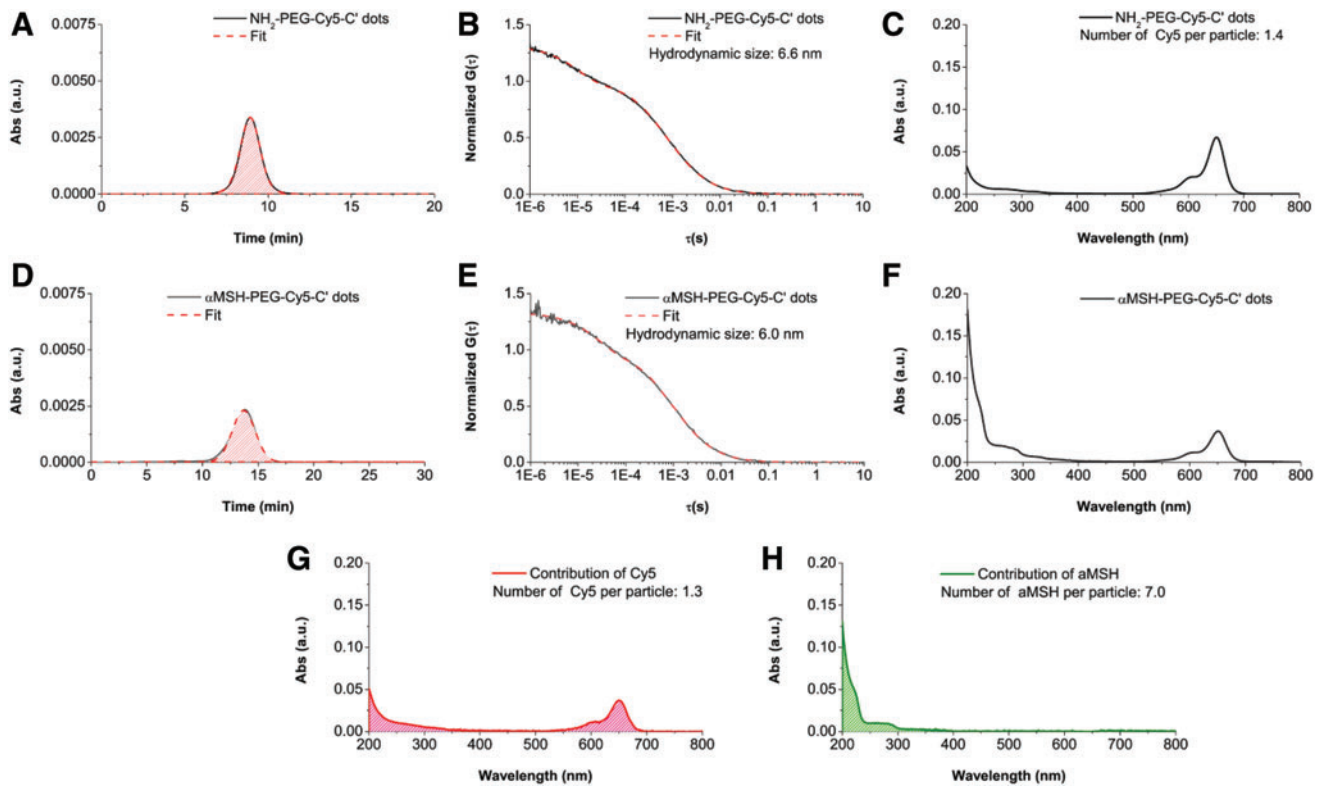

**SUPPLEMENTARY FIG. S1.** Characterization data for NH<sub>2</sub>-PEG-Cy5-C' dots and  $\alpha$ MSH-PEG-Cy5-C' dots. (**A, D**) GPC elugrams of C' dots with fits (n.b., absolute GPC elution times are not comparable since these chromatograms were taken on different days using different columns); (**B, E**) FCS curves with fits and (**C, F**) UV-Vis absorbance of NH<sub>2</sub>-PEG-Cy5-C' dots and  $\alpha$ MSH-PEG-Cy5-C' dots, respectively. UV-Vis spectrum deconvolution of  $\alpha$ MSH-PEG-Cy5-C' dots (**F**), showing contributions of the absorbance of (**G**) Cy5 dye and (**H**)  $\alpha$ MSH peptide, respectively, to the overall spectrum.  $\alpha$ MSH, alpha melanocyte-stimulating hormone; FCS, fluorescence correlation spectroscopy; GPC, gel permeation chromatography; UV, ultraviolet.
