# Supplementary material for: A Genomic Profile of Local Immunity in the Melanoma Microenvironment Following Treatment with α Particle-Emitting Ultrasmall Silica Nanoparticles
Source: PubMed Central journal article supplement (PMC7462037; doi:10.1089/cbr.2019.3150), 2020-08-13
Supplement: Supp_Fig2.pdf [file Supp_Fig2.pdf]

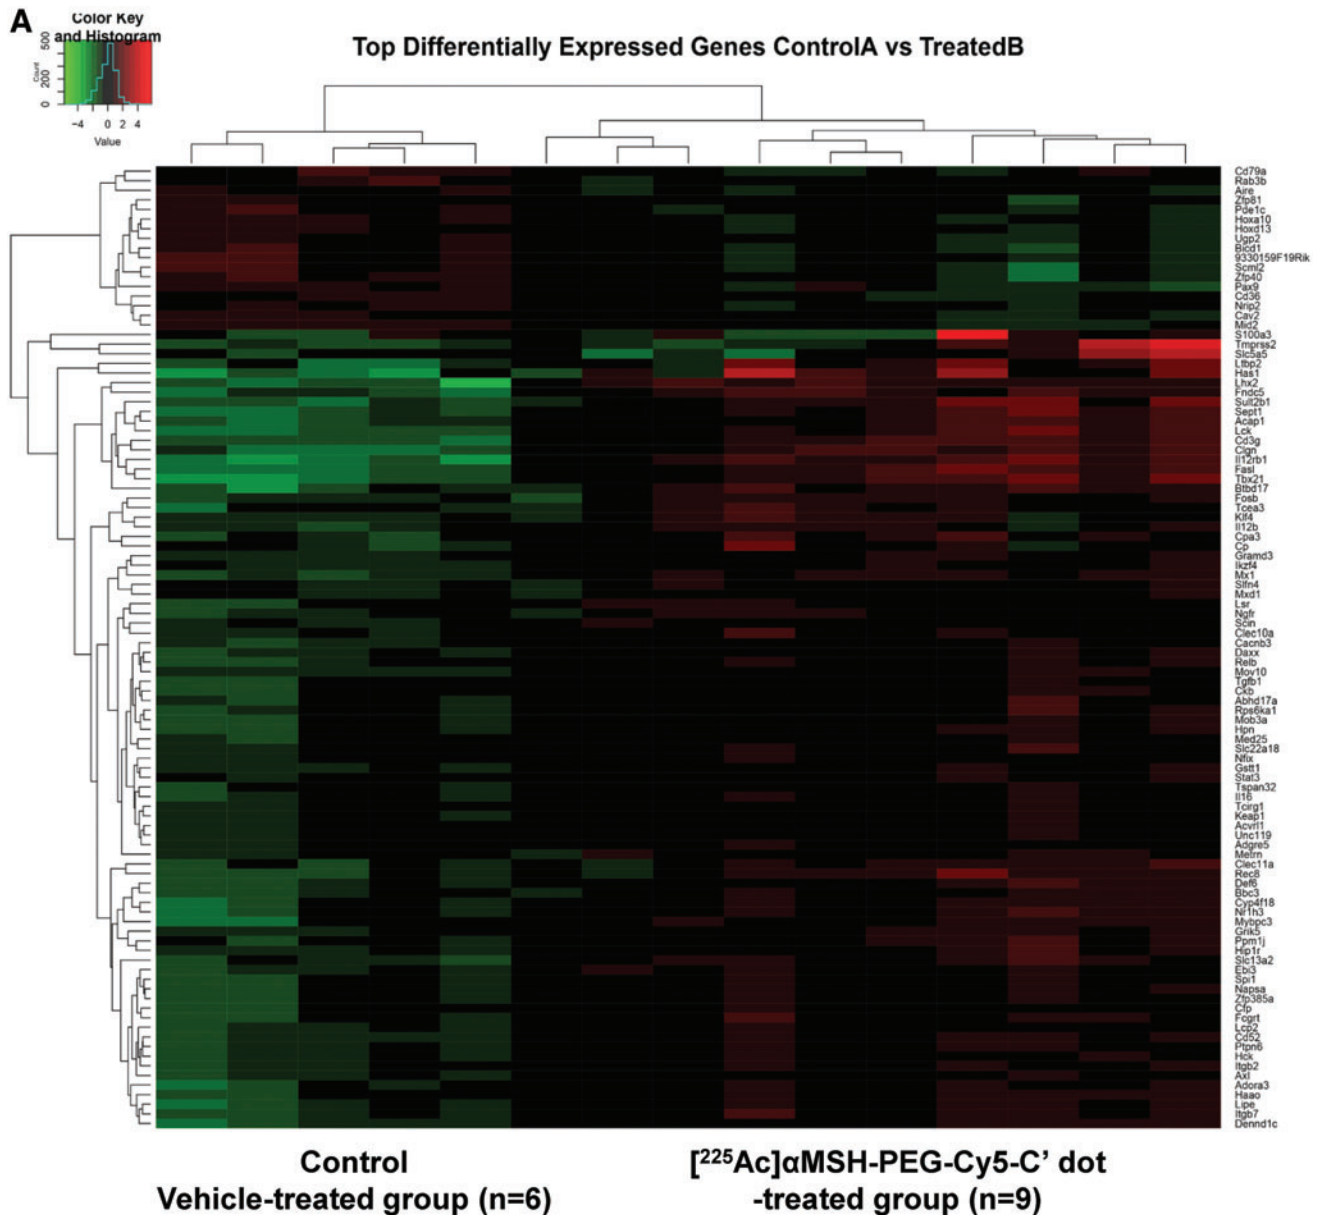

**SUPPLEMENTARY FIG. S2.** Top 100 differentially expressed genes in (A) a vehicle-treated control group versus the [<sup>225</sup>Ac]αMSH-PEG-Cy5-C' dot-treated group; (B) a vehicle-treated control group versus an unlabeled αMSH-PEG-Cy5-C' dot-treated control group; and (C) the [<sup>225</sup>Ac]αMSH-PEG-Cy5-C' dot-treated group versus an unlabeled αMSH-PEG-Cy5-C' dot-treated control group. The top 100 differentially expressed genes (cutoff FC = 2 and FDR = 0.05) are used. The data plot was the mean-centered normalized log<sub>2</sub> expression of the top 100 differentially expressed genes.

**B**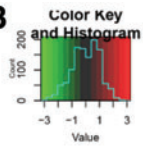

### Top Differentially Expressed Genes ControlA vs TreatedC

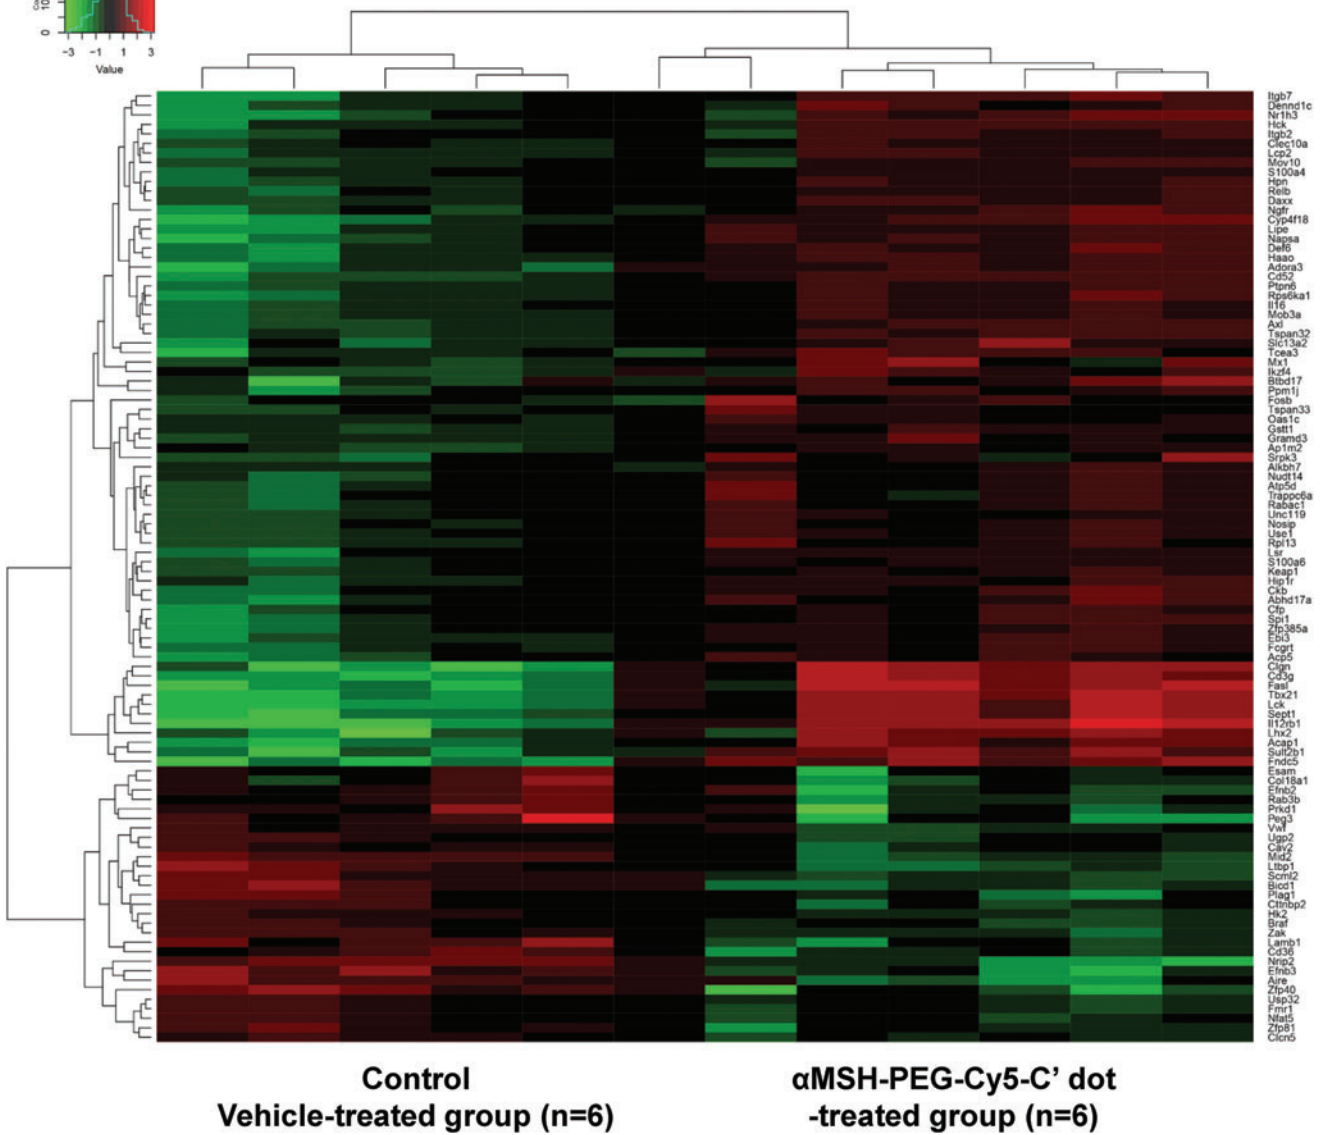

SUPPLEMENTARY FIG. S2. (Continued)

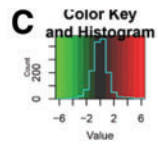

**Top Differentially Expressed Genes TreatedB vs TreatedC**

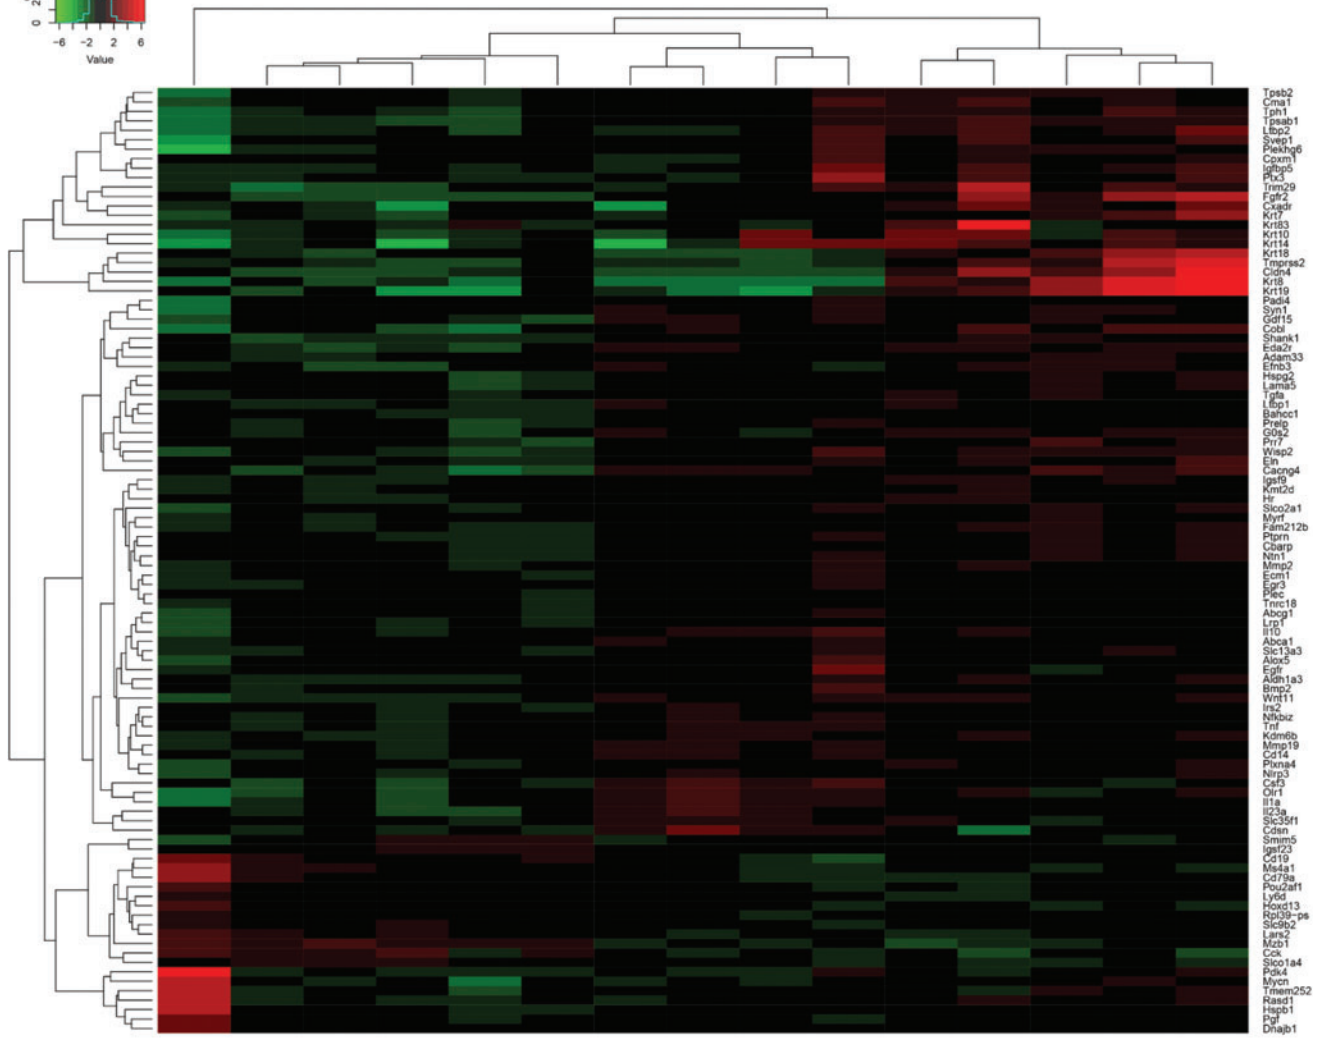

**$\alpha$ MSH-PEG-Cy5-C' dot  
-treated group (n=6)**

**$[^{225}\text{Ac}]\alpha$ MSH-PEG-Cy5-C' dot  
-treated group (n=9)**

SUPPLEMENTARY FIG. S2. (Continued)
