# Supplementary material for: A Genomic Profile of Local Immunity in the Melanoma Microenvironment Following Treatment with α Particle-Emitting Ultrasmall Silica Nanoparticles
Source: PubMed Central journal article supplement (PMC7462037; doi:10.1089/cbr.2019.3150), 2020-08-13
Supplement: Supp_Fig4.pdf [file Supp_Fig4.pdf]

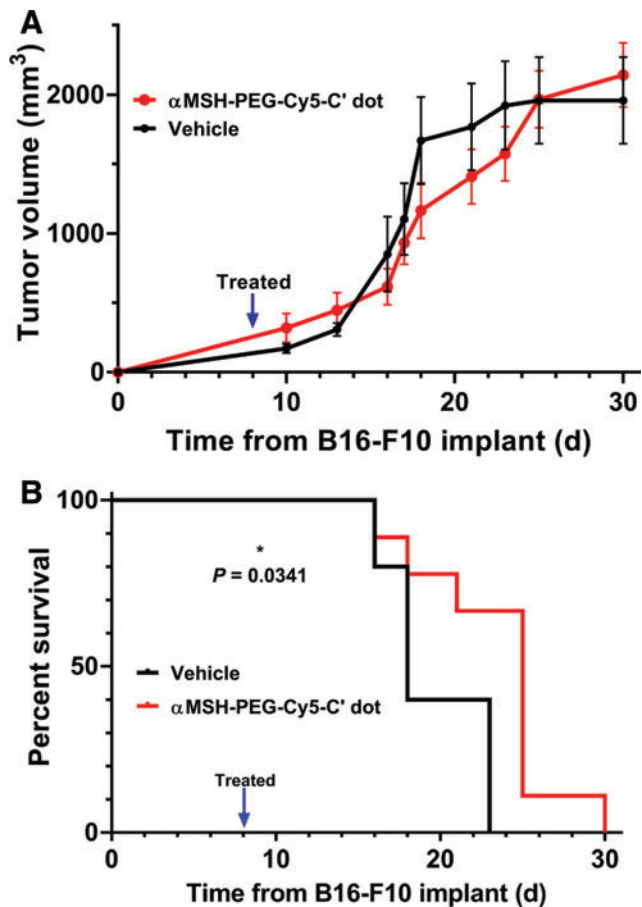

**SUPPLEMENTARY FIG. S4.** (A) Tumor volume measurements and (B) survival plot of B16-F10 tumor-bearing C57BL/6J mice after a single intravenous dose of 55 pmol of unlabeled (“cold”)  $\alpha$ MSH-PEG-Cy5-C’ dot ( $n=10$ ) or the 1% HSA injection vehicle ( $n=5$ ). Data are reported as the mean  $\pm$  SEM. HSA, human serum albumin; SEM, standard error of the mean.
