# Supplementary material for: A Genomic Profile of Local Immunity in the Melanoma Microenvironment Following Treatment with α Particle-Emitting Ultrasmall Silica Nanoparticles
Source: PubMed Central journal article supplement (PMC7462037; doi:10.1089/cbr.2019.3150), 2020-08-13
Supplement: Supp_Fig5.pdf [file Supp_Fig5.pdf]

**SUPPLEMENTARY FIG. S5.** Heat map with cytokines that are differentially expressed in either [<sup>225</sup>Ac]αMSH-PEG-Cy5-C' dot-treated Group B versus vehicle-treated control Group A and αMSH-PEG-Cy5-C' dot-treated Group C versus control Group A.
