# Supplementary material for: A Genomic Profile of Local Immunity in the Melanoma Microenvironment Following Treatment with α Particle-Emitting Ultrasmall Silica Nanoparticles
Source: Cancer Biother Radiopharm. 2020 Aug 13;35(6):459–73. doi: 10.1089/cbr.2019.3150 (PMC7462037; doi:10.1089/cbr.2019.3150)
Supplement: Supplemental data [file Supp_Fig3.pdf]

**SUPPLEMENTARY FIG. S3.** Tabular RNA seq data obtained from the CIBERSORT and ImmuneCC analysis of 25 different murine immune cell signatures in the 21 individual tumors that were harvested and analyzed.
